# Supplementary material for: High‐resolution analysis of the conformational transition of pro‐apoptotic Bak at the lipid membrane
Source: PubMed Central journal article supplement — EMBO J. 2021 Sep 15;40(20):e107159. doi: 10.15252/embj.2020107159 (PMC8521305; doi:10.15252/embj.2020107159), 2021-09-15
Supplement: EMBJ-40-e107159-s002.pdf [file EMBJ-40-e107159-s002.pdf]

## Expanded View Figures

### Figure EV1. Pore-forming assay using Bak $\Delta$ TM and BclxL $\Delta$ TM bound to Ni<sup>2+</sup>-caged lipids in liposomes.

- A, B The data are averaged for the time frame of 9,000–10,000 s and the standard deviation calculated from three measurements, respectively. (A) Influence of Ni<sup>2+</sup>-caged lipids on Bak $\Delta$ TM activity. Liposomes were formed with OMM-like lipids and subjected to 50 nM Bak $\Delta$ TM  $\pm$  20 nM cBid. (B) Influence of the indicated lipid compositions on Bak $\Delta$ TM autoactivity.
- C Influence of cBid (300 nM) and BclxL $\Delta$ TM (300 nM) on Bak $\Delta$ TM (600 nM), when autoactive.
- D Comparison of the effect of BclxL $\Delta$ TM on 600 nM Bak $\Delta$ TM pore formation with and without a His-tag. The inhibitory activity of BclxL is highly dependent on its stable membrane association.
- E Far-UV-CD spectra of Bak $\Delta$ TM  $\pm$  *E. coli* polar liposomes and the Puma-BH3 peptide as indicated.
- F CD-detected thermal melting experiments of Bak $\Delta$ TM (black) with liposomes (red) and Puma-BH3 (blue).
- G Percentile dye release is shown after 420 s for 600 nM Bak $\Delta$ TM  $\pm$  300 nM of an activator. The data are averaged for the time frame of 9,000–10,000 s and the standard deviation calculated from three technical replicates, respectively. Both cBid and Puma-BH3 lead to enhanced liposome permeabilization.

Data information: (C–G) Liposomes were formed using *E. coli* polar lipids.

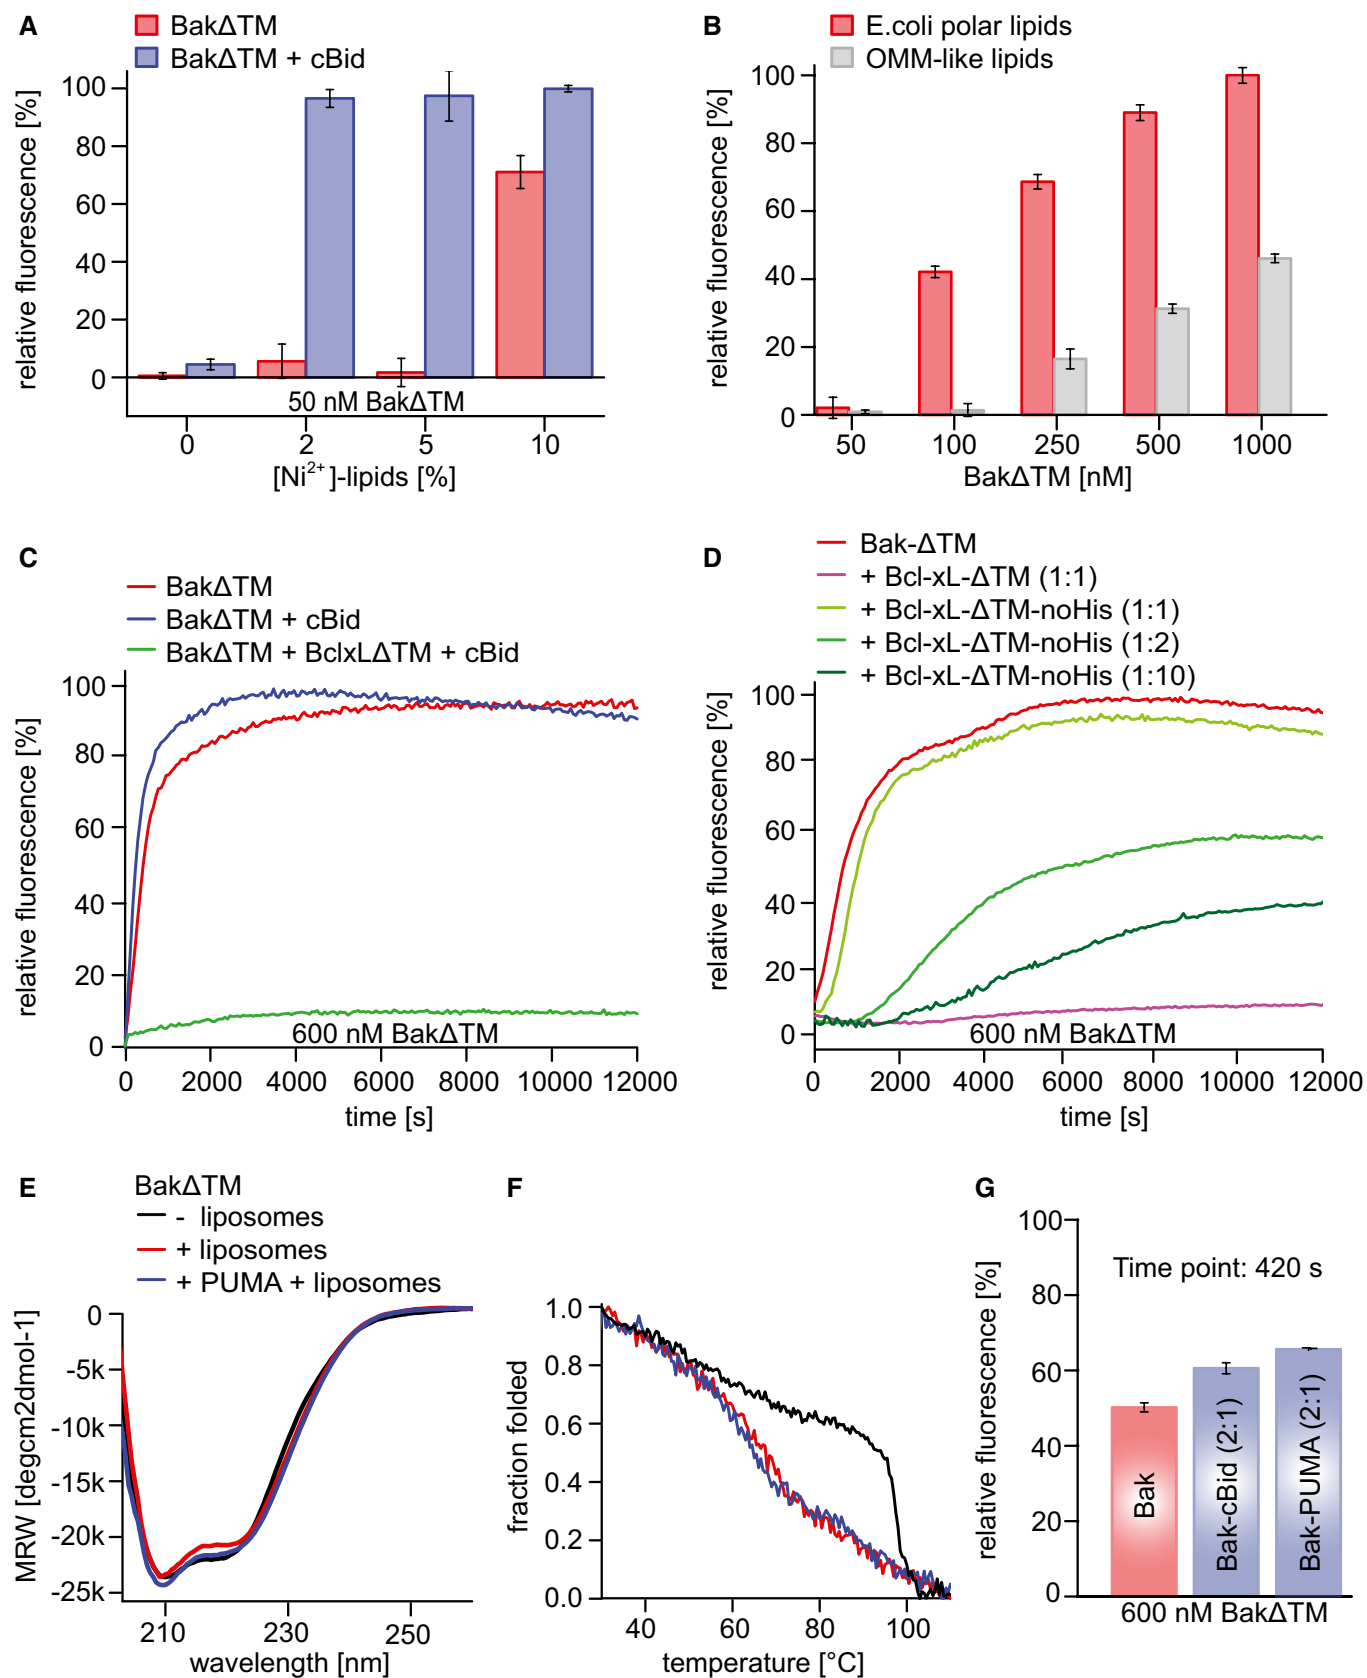

Figure EV1.

**Figure EV2. NMR structural characterization of the Bak soluble domain and the TMH.**

- A NMR secondary chemical shifts of Bak $\Delta$ TM are in agreement with the  $\alpha$ -helical secondary structure content as present in a crystal structure (2IMS.pdb (Moldoveanu *et al*, 2006)) indicated at the top.
- B Correlation between the experimental and back-calculated RDCs for the NMR-refined Bak $\Delta$ TM structure.
- C Comparison of the refined Bak $\Delta$ TM structure containing the full N-terminus with the published crystal structure (2IMS.pdb (Moldoveanu *et al*, 2006)), which was used as an initial structure for the refinement.
- D Comparison of the sequence and structure of the Bak- and BclxL-TMH in nanodiscs. The high similarity is shown by color coding the amino acids according to their polarity (red: apolar, green: polar, blue: basic). Identical amino acids are highlighted in the sequence in gray.
- E SEC profiles of Bak-TMH in nanodiscs after cleaving off the GB1 tag color-coded according to the table on the right. The area under the curve was used to calculate the ratio of TMH/nanodisc. The table shows the applied assembly conditions as well as the expected and calculated amount of TMH/nanodisc. For a dimeric protein like the glycoporin A (GlyA) TMH, the expected and calculated ratios vary, which is not the case for the Bak-TMH.

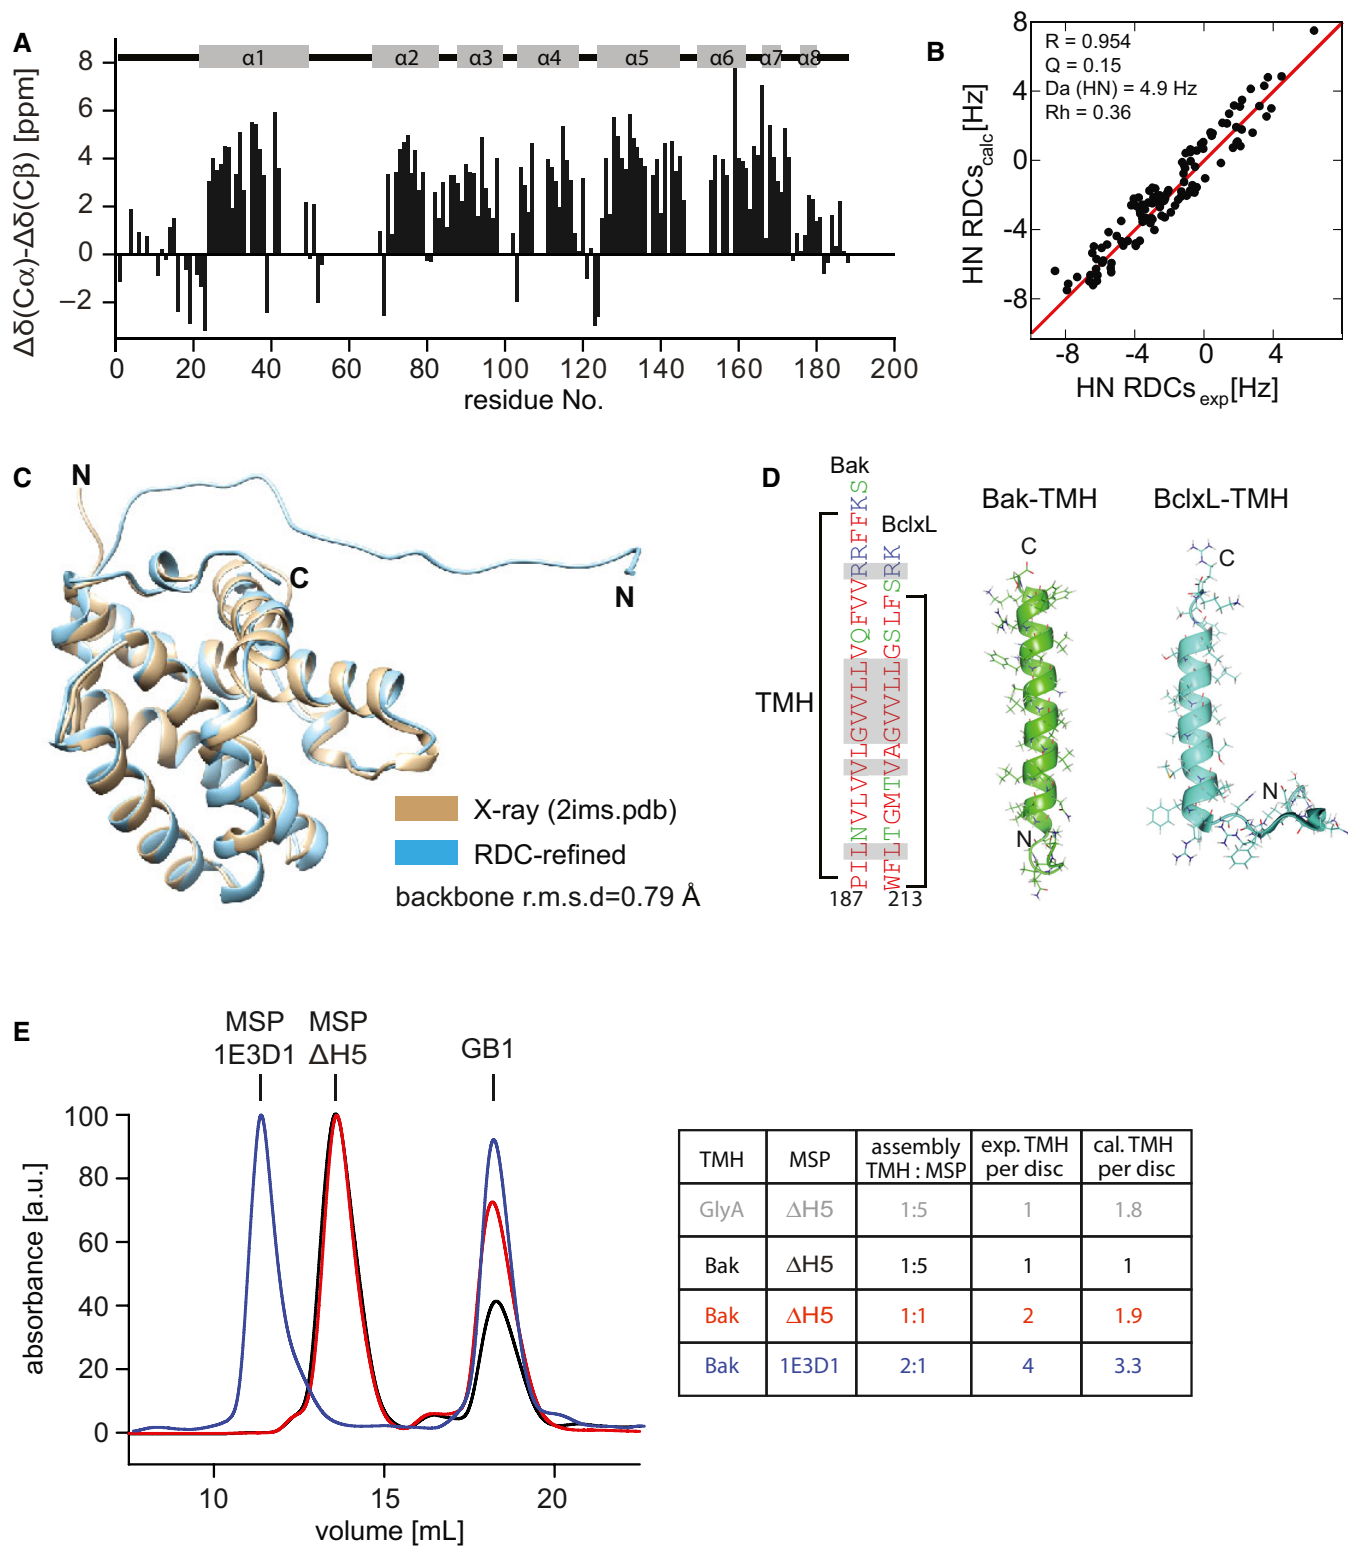

Figure EV2.

**Figure EV3. Biophysical characterization of soluble Bak $\Delta$ TM and BclxL $\Delta$ TM.**

- A 2D- $^{15}\text{N}$ ,  $^1\text{H}$ -HSQC spectra of Bak $\Delta$ TM (left) and BclxL $\Delta$ TM (right) using a protonated (black) or deuterated (red) sample.
- B DLS experiments of Bak $\Delta$ TM (left) and BclxL $\Delta$ TM (right) upon incubation at different temperatures and varying times. The tables on the right state the hydrodynamic diameter in [nm], which is calculated from the measured hydrodynamic radii.
- C Tryptophan fluorescence emission spectra of Bak $\Delta$ TM at different GuHCl concentrations upon excitation at 280 nm.
- D Fluorescence emission spectra of SYPRO Orange binding to Bak $\Delta$ TM at different GuHCl concentrations.
- E 2D- $^{15}\text{N}$ ,  $^1\text{H}$ -HSQC spectra of Bak $\Delta$ TM in the absence (black) and presence of 1.5 M GuHCl (red) and 2.5 M GuHCl (magenta).

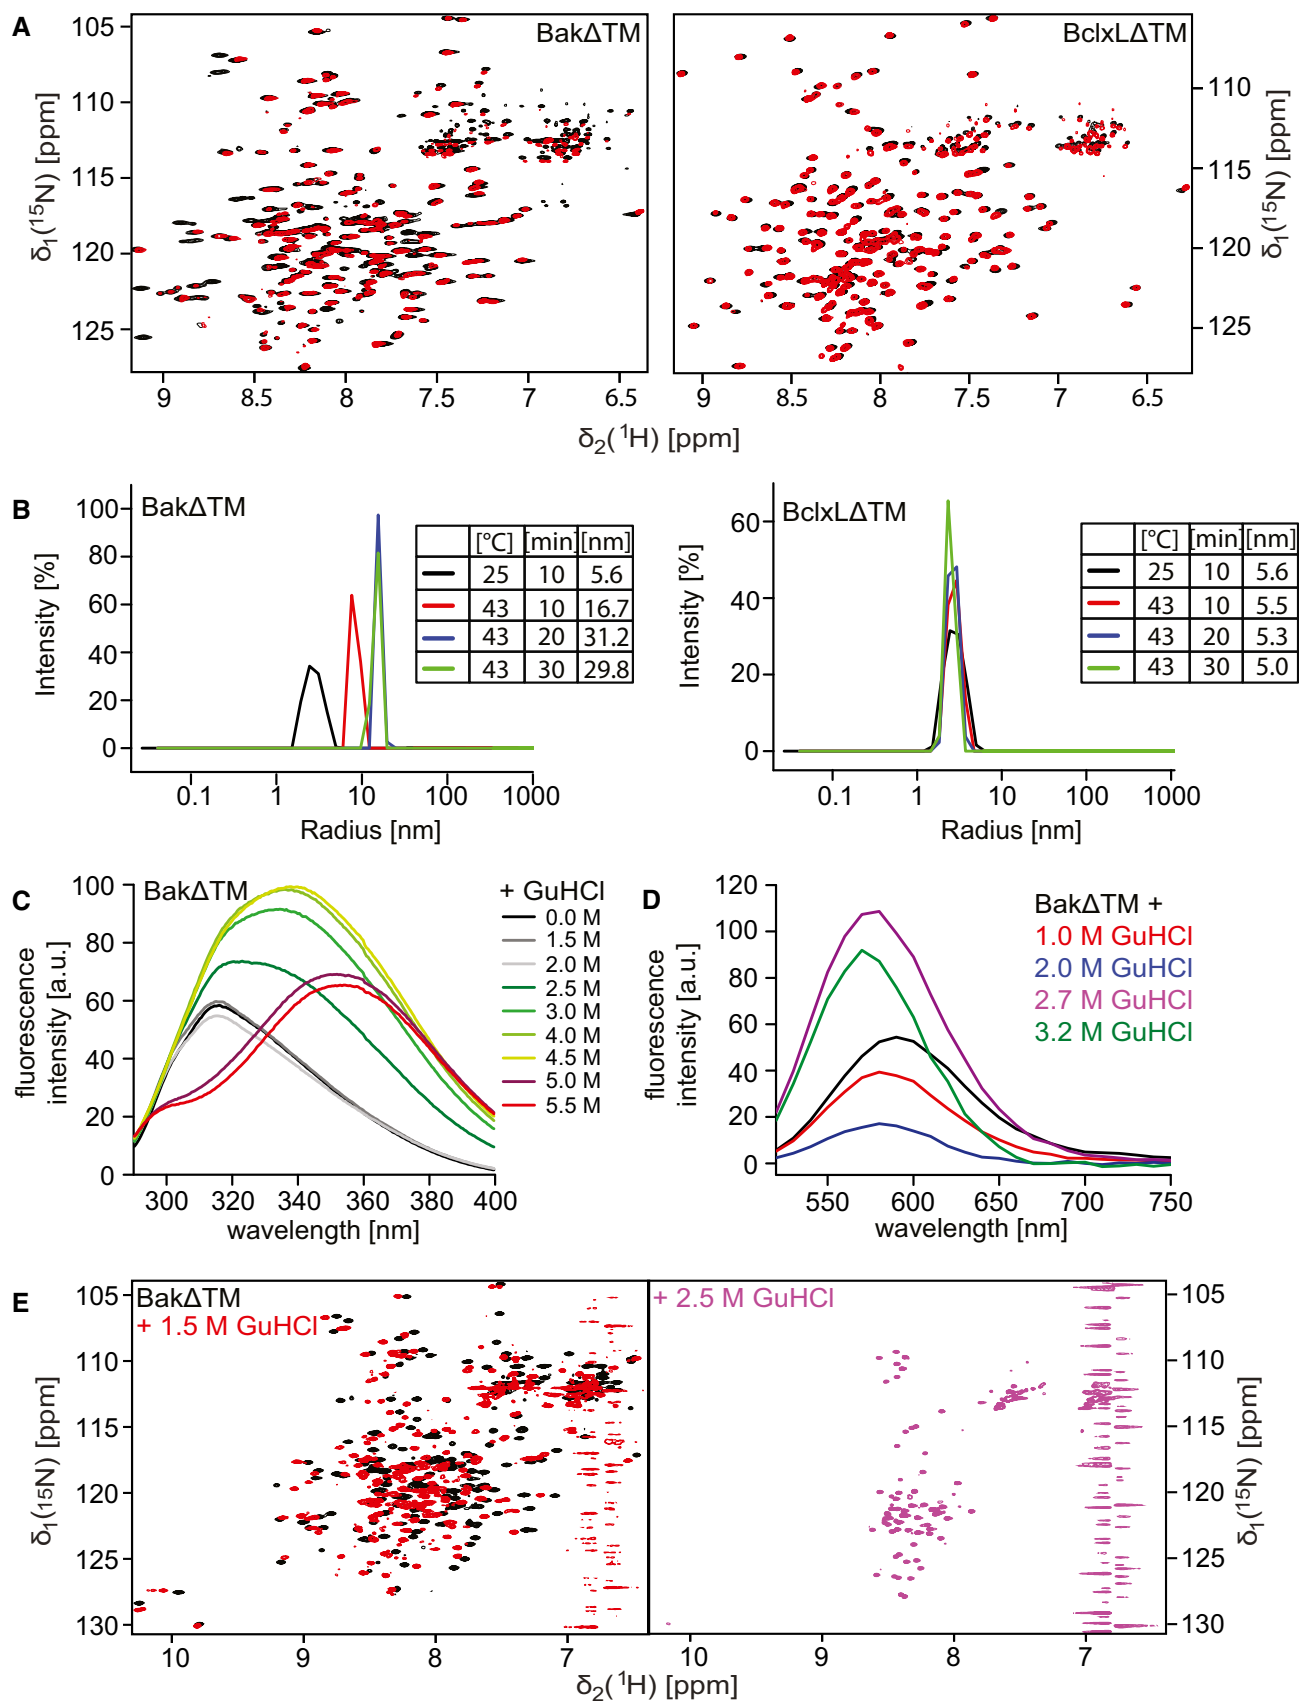

Figure EV3.

**Figure EV4. Characterization of Bak $\Delta$ TM stability and pore-forming activity in nanodiscs and liposomes.**

- A Far-UV-CD thermal melting data of Bak $\Delta$ TM bound to lipid nanodiscs. The melting point at 68.4°C corresponds to Bak $\Delta$ TM, while the later unfolding event at 79.7°C shows the melting of the MSP forming the nanodisc.
- B SDS-PAGE of Cu/phen crosslinking of Bak $\Delta$ TM bound to  $\Delta$ H5 nanodiscs  $\pm$  Bid-BH3 peptide.
- C Size exclusion chromatogram of Bak $\Delta$ TM bound to nanodiscs after activation by Bid-BH3. Inset: SDS-PAGE shows that activated Bak $\Delta$ TM elutes before the main nanodisc peak. The MSP band is very faint due to increased destaining which is sometimes seen for MSP.
- D Pore-forming assay with 600 nM Bak $\Delta$ TM in liposomes of 30 nm size.
- E Comparison of the deuterium uptake of the active Bak species in liposomes (black) and  $\Delta$ H5 nanodiscs (blue). The HDX-MS detected deuterium uptake is compared after 10 s at the top and 2 h at the bottom.

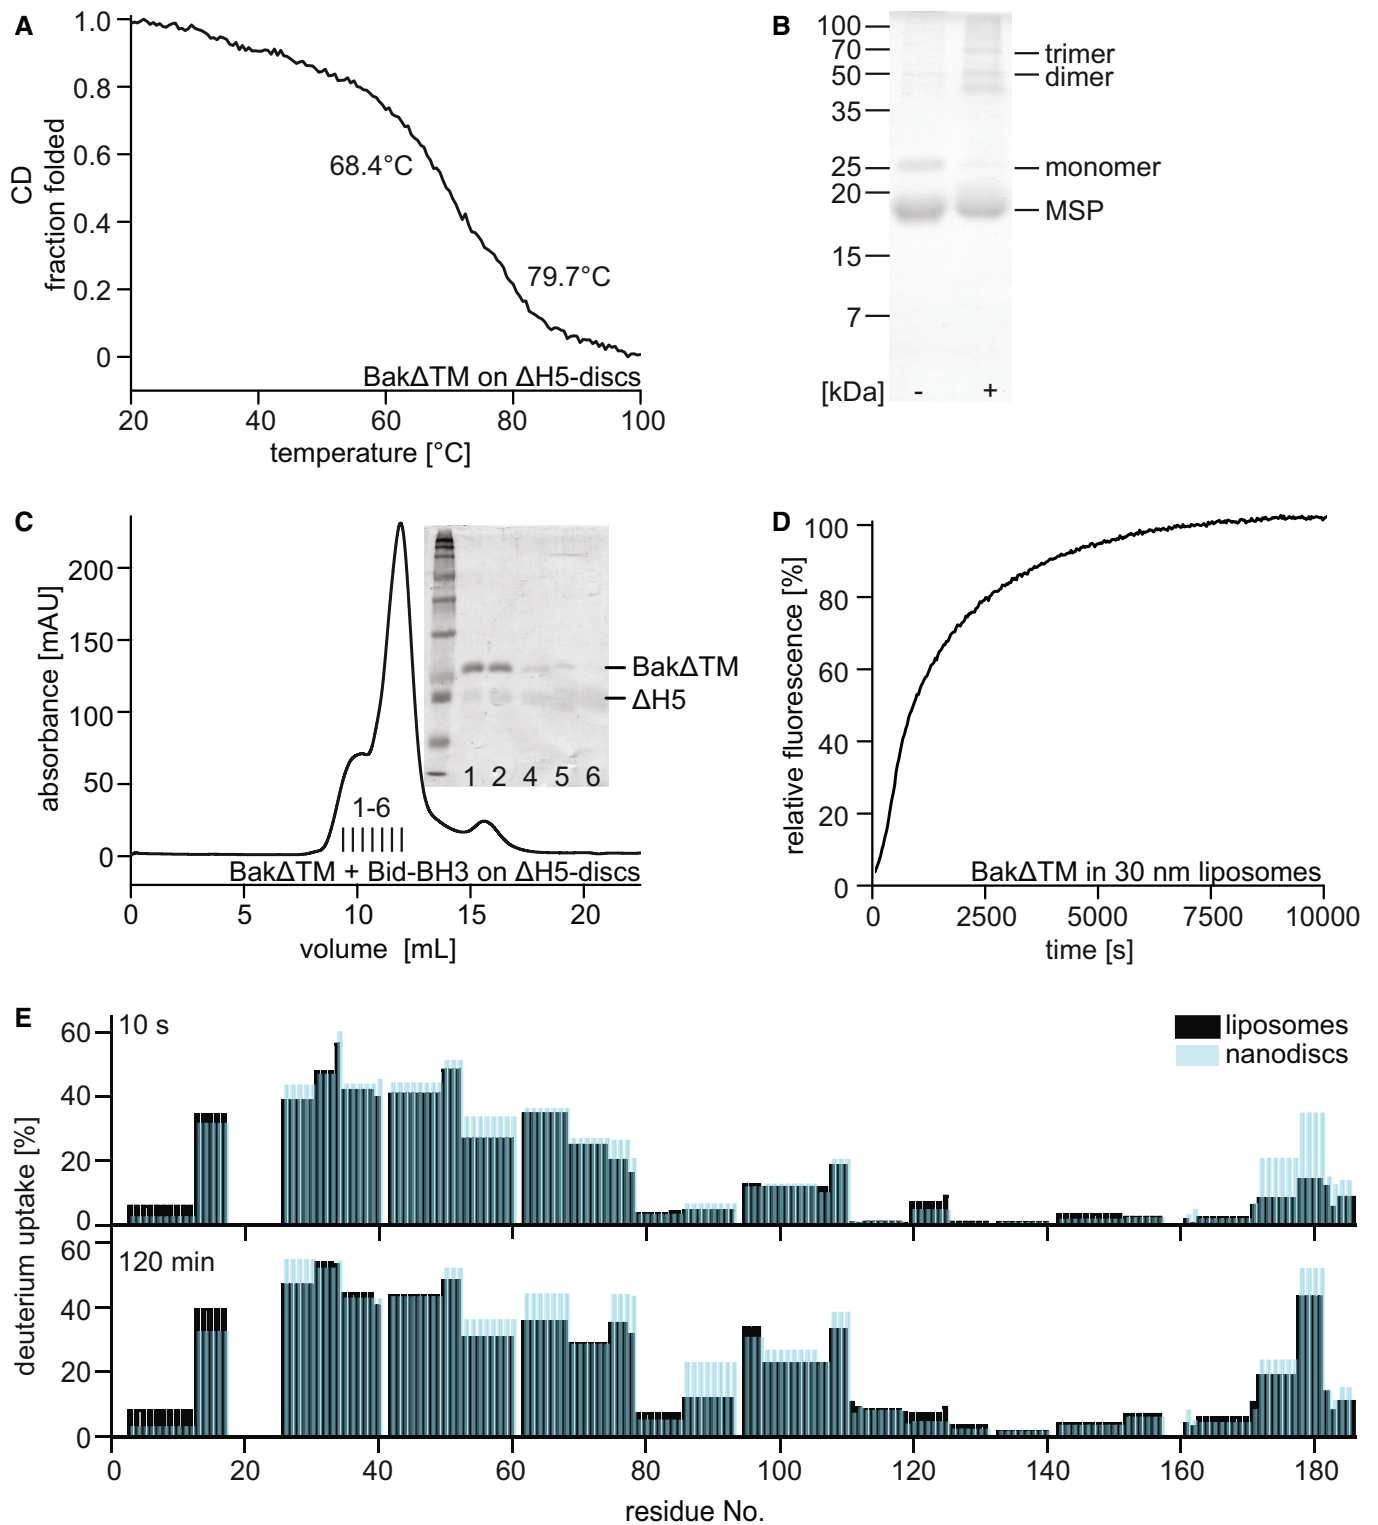

Figure EV4.



**Figure EV5. HDX-MS data of Bak $\Delta$ TM.**

- A HDX peptide coverage maps of the different Bak $\Delta$ TM samples. Bak $\Delta$ TM: Total coverage was 100% with 126 peptides and a redundancy of 6.96. Bak $\Delta$ TM +  $\Delta$ H5 nanodiscs (inactive): Total coverage was 99% with 83 peptides and a redundancy of 4.47. Bak $\Delta$ TM +  $\Delta$ H5 nanodiscs + Bid-BH3 (active): Total coverage was 97% with 76 peptides and a redundancy of 4.25.
- B HDX graphs of three peptides, located in different helices as indicated, displaying the relative deuterium uptake during the reaction time. Two biological replicates were measured for each state. (ND =  $\Delta$ H5 nanodiscs).
- C HDX-MS experiments of unbound Bak $\Delta$ TM and Bak $\Delta$ TM bound to Ni-nanodiscs in the inactive state and after activation with the Bid-derived BH3 peptide. HDX was mapped to the Bak $\Delta$ TM structure and colored according to the measured exchange rates after the incubation times indicated. Blue colors correspond to a lower (less accessible) and red colors to a higher (more accessible) fractional uptake of deuterium.

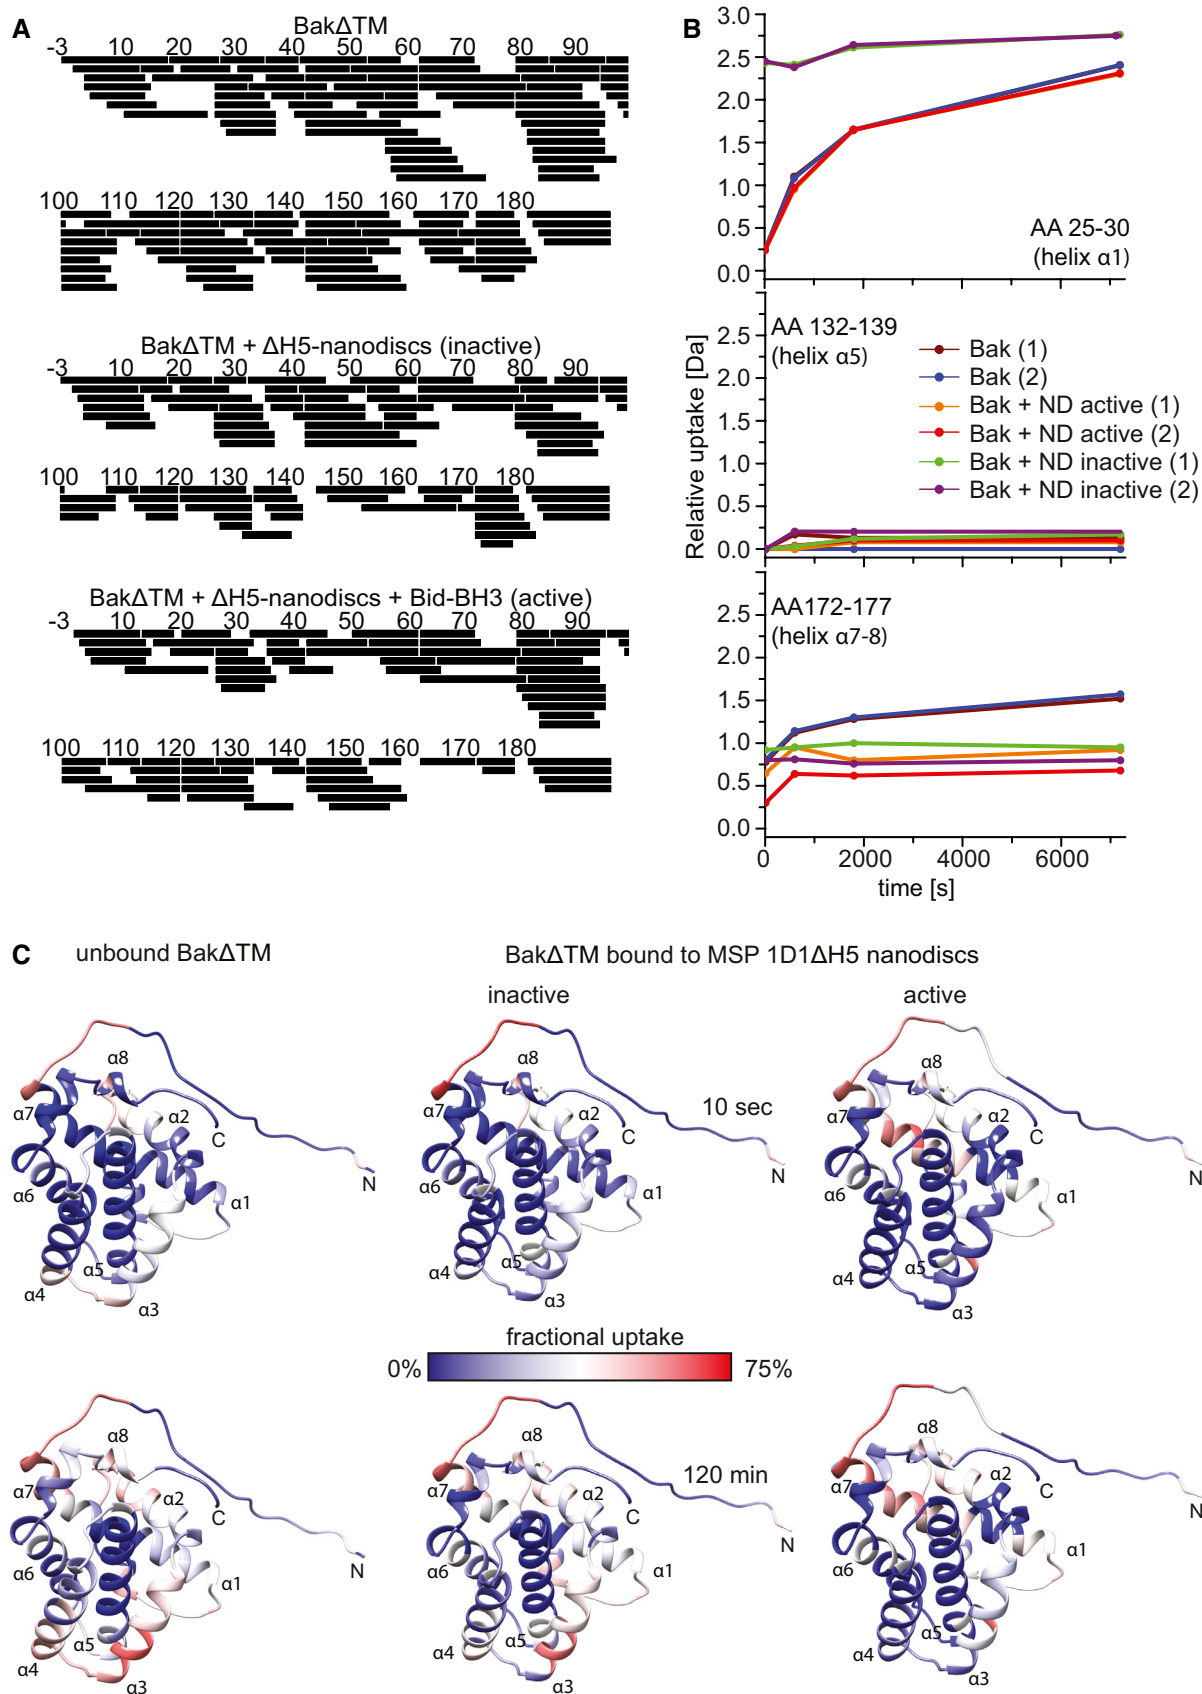

Figure EV5.
